# Supplementary material for: Study on the Correlations between Quality Indicators of Dry-Aged Beef and Microbial Succession during Fermentation
Source: MDPI journal article supplement (doi:10.3390/foods13101552), 2024-05-16
Supplement: s1 [file s1]

**Journal:** *Foods*

**Manuscript Title:** Study on the correlations between quality indicators of dry-aged beef and microbial succession during fermentation

**Authors:** Yuliang Cheng, Yiyun Meng, Lin Xu, Hang Yu, Yahui Guo, Yunfei Xie, Weirong Yao, He Qian

**Affiliations and Addresses:** State Key Laboratory of Food Science and Resources, School of Food Science and Technology, Collaborative Innovation Center of Food Safety and Quality Control in Jiangsu Province, Jiangnan University, Wuxi 214122, PRChina

**Correspondence to:** ylcheng@jiangnan.edu.cn (CYL).

**Table S1** Analysis of key flavor compounds of the dry-aged beef

| Flavor compounds | Species         | Odor characteristics [29-30]                              | Sensory                           | ROAV   |        |        |        |        |
|------------------|-----------------|-----------------------------------------------------------|-----------------------------------|--------|--------|--------|--------|--------|
|                  |                 |                                                           | threshold<br>( $\mu\text{g/kg}$ ) | 0 d    | 3.5 d  | 7 d    | 14 d   | 21 d   |
| aldehydes        | Hexanal         | Fragrance of grass, fruit, leaf                           | 4.5                               | —      | 0.11   | 0.45   | 0.99   | 0.44   |
|                  | Heptanal        | Fruit, milk, soap                                         | 3                                 | 0.94   | 3.27   | 5.02   | —      | 2.17   |
|                  | Octanal         | Citrus, lemon, honey, Aroma of fruit, wax,<br>fresh grass | 0.8                               | 10.10  | 17.97  | 11.70  | 10.86  | 14.33  |
|                  | Nonanal         | Fragrance of flowers, citrus, grass, wax,<br>fat          | 1                                 | 100.00 | 100.00 | 40.99  | 53.38  | 100.00 |
|                  | Furfural        | Aromas of wood, caramel, baked goods                      | 3                                 | 0.20   | 0.27   | —      | —      | —      |
| alcohols         | Pentanol        | Mild fruit and spice aromas                               | 0.15                              | —      | 14.41  | 100.00 | 100.00 | 27.33  |
|                  | 1-Octanol       | Strong floral, citrus, walnut, moss notes                 | 110                               | 0.08   | 0.10   | 0.13   | 0.11   | 0.09   |
|                  | Oct-1-en-3-ol   | Mushroom, earth, grass, lavender, rose                    | 1                                 | 2.16   | 3.75   | 9.73   | 6.55   | 6.24   |
| alkenes          | Styrene         | Sweet scent, floral scent, sesame oil scent               | 47                                | 0.14   | 0.01   | —      | 0.54   | 0.05   |
| ketones          | Acetoin         | Strong notes of milk, butter, mushroom,<br>and vanilla    | 55                                | 0.85   | 0.30   | 3.25   | 6.45   | 0.67   |
| esters           | Vinyl Hexanoate | Ester flavor                                              | 7.5                               | 0.29   | 0.33   | 1.80   | —      | —      |
| furans           | 2-Amylfuran     | Fresh, meaty, mung bean, butter                           | 6                                 | 0.31   | 0.70   | 1.09   | 0.80   | 0.24   |

**Table S2** Effective sequence statistics of bacteria and fungi

| Sample | Bacteria                          |                                       | Fungi                             |                                       |
|--------|-----------------------------------|---------------------------------------|-----------------------------------|---------------------------------------|
|        | The number of effective sequences | The length of effective sequences (M) | The number of effective sequences | The length of effective sequences (M) |
| 0 d    | 65490                             | 27.28                                 | 80432                             | 22.02                                 |
| 3.5 d  | 67267                             | 28.38                                 | 80452                             | 21.77                                 |
| 7 d    | 62268                             | 26.53                                 | 79890                             | 21.77                                 |
| 14 d   | 56089                             | 23.94                                 | 75915                             | 21.08                                 |
| 21 d   | 67244                             | 28.70                                 | 80477                             | 21.72                                 |

**Table S3** Diversity analysis of bacterial community during the dry aging process

| Sample | Shannon | Simpson | Chao1  | Goods _coverage |
|--------|---------|---------|--------|-----------------|
| 0 d    | 6.42    | 0.97    | 279.00 | 1.00            |
| 3.5 d  | 4.58    | 0.87    | 162.05 | 1.00            |
| 7 d    | 2.78    | 0.65    | 39.83  | 1.00            |
| 14 d   | 3.64    | 0.87    | 34.33  | 1.00            |
| 21 d   | 2.64    | 0.65    | 37.33  | 1.00            |

**Table S4** Diversity analysis of fungi during the dry aging process

| Sample | Shannon | Simpson | Chao1 | Goods_coverage |
|--------|---------|---------|-------|----------------|
| 0 d    | 3.52    | 0.79    | 77.00 | 1.00           |
| 3.5 d  | 2.76    | 0.69    | 56.00 | 1.00           |
| 7 d    | 1.87    | 0.49    | 50.67 | 1.00           |
| 14 d   | 2.72    | 0.71    | 41.67 | 1.00           |
| 21 d   | 1.59    | 0.44    | 39.00 | 1.00           |
